# Supplementary material
Source: PubMed Central journal article supplement (PMC6251726)
Supplement: NIHMS993822-supplement-supporting_information.pdf [file NIHMS993822-supplement-supporting_information.pdf]

## Supporting Information for

*Manganese-Hydroxido Complexes Supported by a Urea/Phosphinic Amide Tripodal Ligand*

Victoria F. Oswald<sup>§</sup>, Andrew C. Weitz<sup>¶</sup>, Saborni Biswas<sup>‡</sup>, Joseph W. Ziller, Michael P. Hendrich<sup>¶</sup> and A. S. Borovik<sup>\*§</sup>.

<sup>§</sup>Department of Chemistry, University of California-Irvine, 1102 Natural Sciences II, Irvine, CA 92697

<sup>¶</sup>Department of Chemistry, Carnegie Mellon University, Pittsburgh, PA 15213

### Contents

|                                                                                                                                                                                                                                                                                   |    |
|-----------------------------------------------------------------------------------------------------------------------------------------------------------------------------------------------------------------------------------------------------------------------------------|----|
| <b>Table S1.</b> Crystallographic Data and Structure Refinement Parameters for [Mn <sup>II</sup> H <sub>2</sub> pout(OH)] <sup>2-</sup> and [Mn <sup>III</sup> H <sub>2</sub> pout(OH)] <sup>-</sup>                                                                              | S2 |
| <b>Preparative Methods:</b> Mn-Oxido Complexes                                                                                                                                                                                                                                    | S2 |
| <b>Figure S1.</b> Possible structures of [Mn <sup>IV</sup> H <sub>2</sub> pout(OH)] <sup>-</sup> determined by DFT                                                                                                                                                                | S4 |
| <b>Figure S2.</b> UV-visible spectra of [Mn <sup>III</sup> H <sub>2</sub> pout(OH)] <sup>2-</sup> , [Mn <sup>III</sup> H <sub>2</sub> pout(O)] <sup>2-</sup> , [Mn <sup>IV</sup> H <sub>2</sub> pout(OH)] <sup>-</sup> and [Mn <sup>IV</sup> H <sub>2</sub> pout(O)] <sup>-</sup> | S5 |
| <b>Figure S3.</b> EPR spectra of [Mn <sup>III</sup> H <sub>2</sub> pout(O)] <sup>2-</sup> and [Mn <sup>IV</sup> H <sub>2</sub> pout(O)] <sup>-</sup>                                                                                                                              | S5 |
| <b>Figure S4.</b> FTIR spectra of [Mn <sup>II</sup> H <sub>2</sub> pout(OH)] <sup>2-</sup> and [Mn <sup>III</sup> H <sub>2</sub> pout(OH)] <sup>-</sup>                                                                                                                           | S6 |
| References                                                                                                                                                                                                                                                                        | S6 |

**Table S1.** Crystallographic Data and Structure Refinement Parameters

| Complex                            | K <sub>2</sub> [Mn <sup>III</sup> H <sub>2</sub> POUT(OH)]                       | K[Mn <sup>III</sup> H <sub>2</sub> POUT(OH)]                       |
|------------------------------------|----------------------------------------------------------------------------------|--------------------------------------------------------------------|
| Empirical Formula                  | C <sub>36</sub> H <sub>61</sub> K <sub>2</sub> MnN <sub>8</sub> O <sub>6</sub> P | C <sub>36</sub> H <sub>61</sub> KMnN <sub>8</sub> O <sub>6</sub> P |
| Formula weight                     | 866.03                                                                           | 776.87                                                             |
| Crystal system                     | Orthorhombic                                                                     | Triclinic                                                          |
| Space group                        | Pbca                                                                             | P $\bar{1}$                                                        |
| a (Å)                              | 17.8861(7)                                                                       | 11.5758(11)                                                        |
| b (Å)                              | 21.3269(8)                                                                       | 13.6752(13)                                                        |
| c (Å)                              | 23.3999(9)                                                                       | 14.4278(14)                                                        |
| $\alpha$ (°)                       | 90°                                                                              | 70.2118(11)°                                                       |
| $\beta$ (°)                        | 90°                                                                              | 72.9494(11)°                                                       |
| $\chi$ (°)                         | 90°                                                                              | 73.1226(12)°                                                       |
| Volume (Å <sup>3</sup> )           | 8926.0(6)                                                                        | 2007.7(3)                                                          |
| Z                                  | 8                                                                                | 2                                                                  |
| $\delta$ calc (Mg/m <sup>3</sup> ) | 1.289                                                                            | 1.285                                                              |
| GOF                                | 1.015                                                                            | 1.032                                                              |
| R1                                 | 0.0343                                                                           | 0.0377                                                             |
| wR2                                | 0.0823                                                                           | 0.092                                                              |
| CCDC Code                          | 1849229                                                                          | 1849228                                                            |

### *Preparative Methods for Mn-Oxido Complexes.*

*Preparation of Low-Temperature [Mn<sup>III</sup>H<sub>2</sub>pout(O)]<sup>2-</sup> EPR Samples.* A solution of [Mn<sup>III</sup>H<sub>2</sub>pout(OH)]<sup>-</sup> (~15 mM, 250  $\mu$ L) in a DMF:THF mixture was transferred to an EPR tube and sealed with a rubber septum. The tube was brought out of the dry box and placed in a -30 °C acetonitrile/dry ice bath and allowed to equilibrate for fifteen minutes. A 0.5 M (0.028 g, 0.25 mmol) stock solution of KO<sup>t</sup>Bu was prepared in a DMF:THF mixture and one equiv (8  $\mu$ L) was added via a syringe. After mixing by careful shaking of the tube, the EPR tube was quickly removed from the cold bath, wiped clean of acetonitrile, and frozen in liquid nitrogen before analysis.

*Preparation of Low-Temperature [Mn<sup>IV</sup>H<sub>2</sub>pout(O)]<sup>-</sup> EPR Samples.* Samples were prepared in an analogous manner as described above with the following modifications: subsequent addition of one equivalent of FcBF<sub>4</sub> (18  $\mu$ L of a 220 mM stock solution). Sample was prepared in a -80 °C acetone/dry ice bath.

*Generation of [Mn<sup>III</sup>H<sub>2</sub>pout(O)]<sup>2-</sup> at Low Temperature using UV-vis Spectroscopy.* For a typical experiment, a stock solution of [Mn<sup>III</sup>H<sub>2</sub>pout(OH)]<sup>-</sup> at 20 mM concentration (0.013 g, 0.020 mmol) was prepared in a DMF:THF mixture (1 mL) and stored at -35 °C. To a 1 cm cuvette

was added 2 mL of DMF:THF mixture and 40  $\mu$ L of metal complex solution giving the desired experiment concentration (400  $\mu$ M). The cuvette was sealed with a rubber septum then transferred to the precooled UV-vis spectrometer cryostat and allowed to equilibrate for at least 15 minutes at - 30  $^{\circ}$ C under a flow of argon gas. A 45 mM (0.010 g, 0.089 mmol) stock solution of KO<sup>t</sup>Bu was prepared in 1 mL of a DMF:THF mixture and one equiv (18  $\mu$ L) was added via a syringe and the progress of the reaction monitored optically.

*Generation of [Mn<sup>IV</sup>H<sub>2</sub>pout(O)]<sup>-</sup> at Low Temperature using UV-vis Spectroscopy.* Experiments were performed in an analogous manner as described above with the following modifications: subsequent addition of one equivalent (20  $\mu$ L) of a 40 mM FcBF<sub>4</sub> (0.011 g, 0.040 mmol) stock in 1 mL of DMF:THF mixture at - 80  $^{\circ}$ C.

**Computational Methods.** The DFT calculations were performed with Gaussian '09 using the hybrid functional B3LYP and the basis set 6-311G.<sup>1</sup>

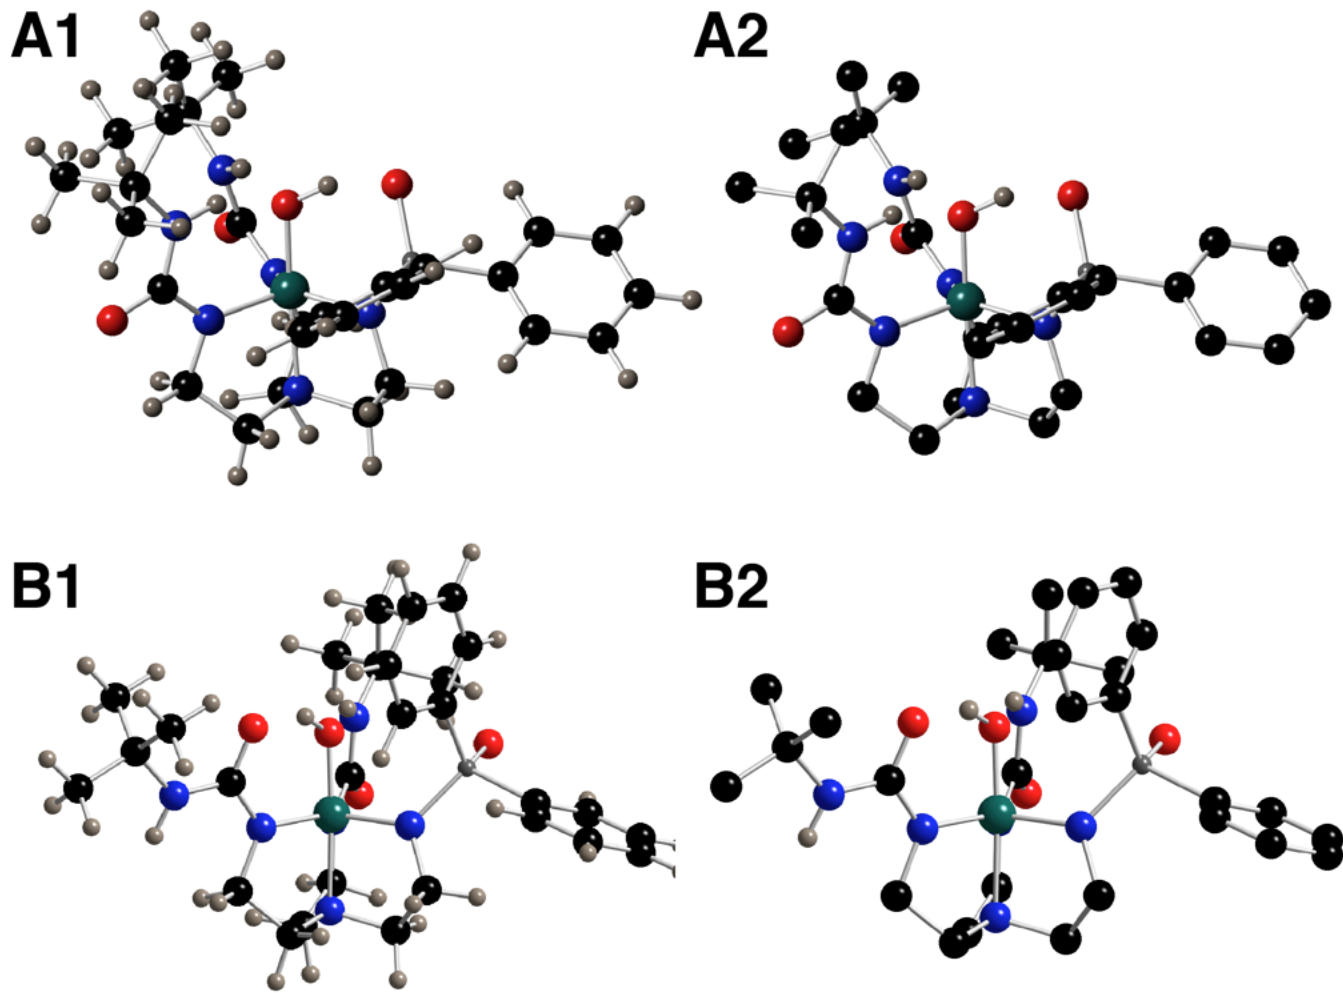

**Figure S1.** Possible structures for the two Mn<sup>IV</sup>-OH complexes of [Mn<sup>IV</sup>H<sub>2</sub>pout(OH)] determined from DFT. Hydrogens removed for clarity in A2 and B2.

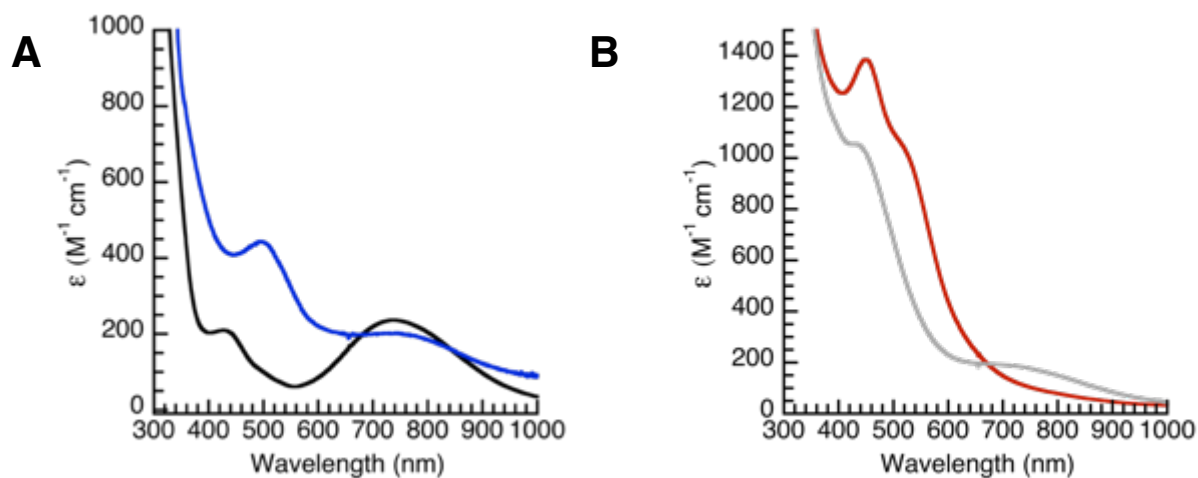

**Figure S2.** Overlaid UV-visible spectra of  $[\text{Mn}^{\text{III}}\text{H}_2\text{pout}(\text{OH})]^{2-}$  (—),  $[\text{Mn}^{\text{III}}\text{H}_2\text{pout}(\text{O})]^{2-}$  (—) (A),  $[\text{Mn}^{\text{IV}}\text{H}_2\text{pout}(\text{OH})]^{-}$  (—) and  $[\text{Mn}^{\text{IV}}\text{H}_2\text{pout}(\text{O})]^{-}$  (—) (B). Spectra were recorded in a 1:1 DMF:THF mixture at  $-30\text{ }^{\circ}\text{C}$  and  $-80\text{ }^{\circ}\text{C}$ , respectively.

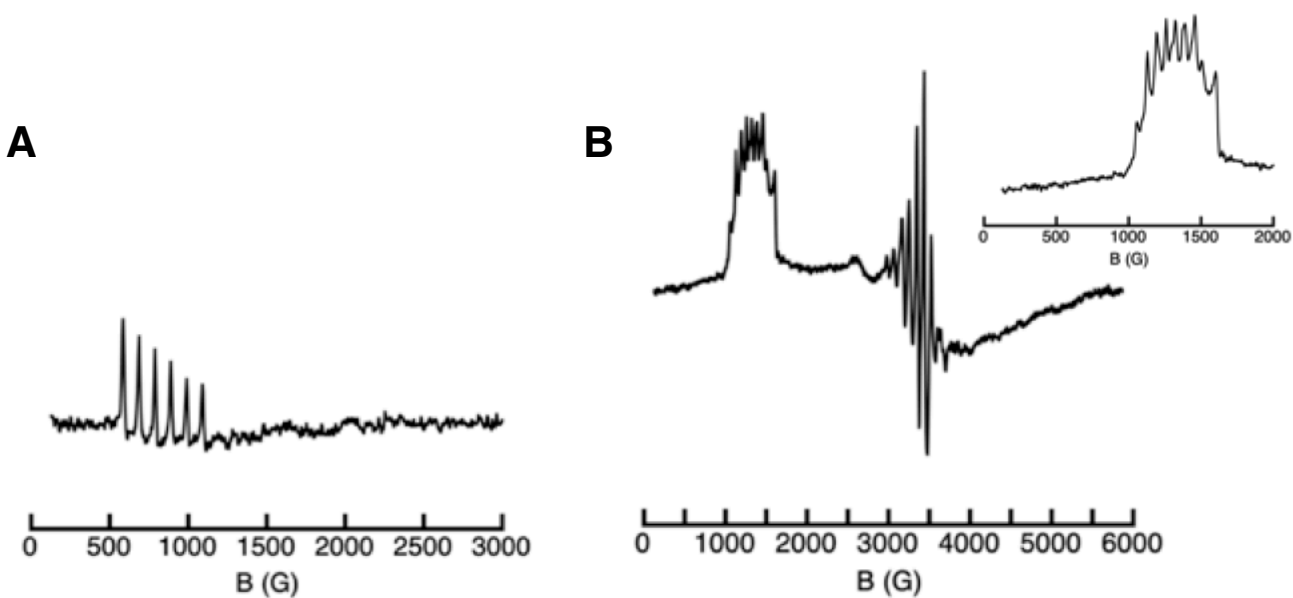

**Figure S3.** Parallel-mode EPR spectrum of a frozen solution of  $[\text{Mn}^{\text{III}}\text{H}_2\text{pout}(\text{O})]^{2-}$  (A) and perpendicular-mode EPR spectrum of a frozen solution  $[\text{Mn}^{\text{IV}}\text{H}_2\text{pout}(\text{O})]^{-}$  (B) in 1:1 DMF:THF. Inset: Zoom of low-field region. Sample temperature was 10 K.

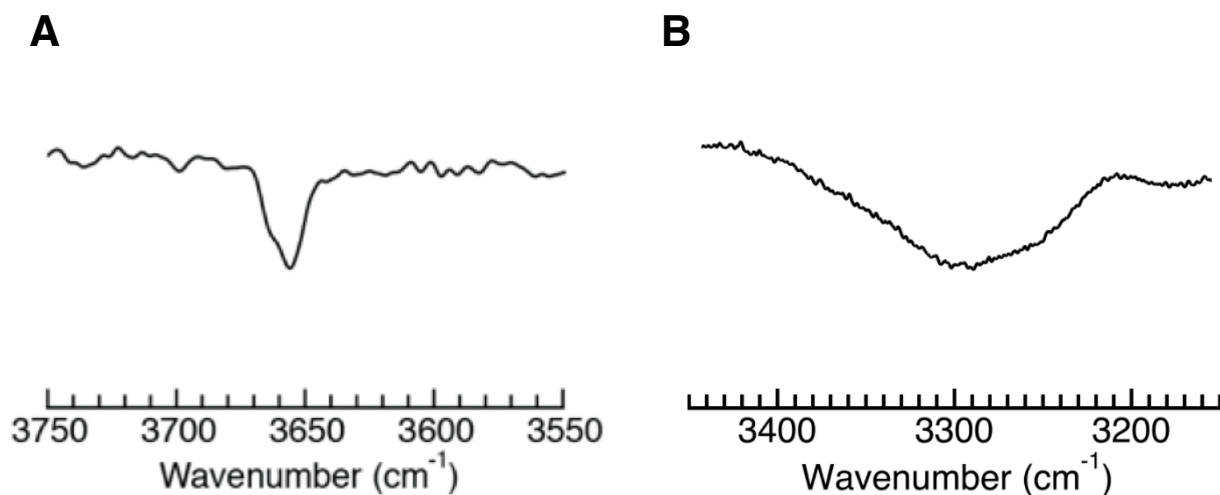

**Figure S4.** FTIR spectra for  $[\text{Mn}^{\text{II}}\text{H}_2\text{pout}(\text{OH})]^{2-}$  (A) and  $[\text{Mn}^{\text{III}}\text{H}_2\text{pout}(\text{OH})]^{-}$  (B) illustrating the region for the O-H vibration.

## References.

- Revision A.02, Frisch, M. J.; Trucks, G. W.; Schlegel, H. B.; Scuseria, G. E.; Robb, M. A.; Cheeseman, J. R.; Scalmani, G.; Barone, V.; Mennucci, B.; Petersson, G. A.; Nakatsuji, H.; Caricato, M.; Li, X.; Hratchian, H. P.; Izmaylov, A. F.; Bloino, J.; Zheng, G.; Sonnenberg, J. L.; Hada, M.; Ehara, M.; Toyota, K.; Fukuda, R.; Hasegawa, J.; Ishida, M.; Nakajima, T.; Honda, Y.; Kitao, O.; Nakai, H.; Vreven, T.; Montgomery, J. A., Jr.; Peralta, J. E.; Ogliaro, F.; Bearpark, M.; Heyd, J. J.; Brothers, E.; Kudin, K. N.; Staroverov, V. N.; Kobayashi, R.; Normand, J.; Raghavachari, K.; Rendell, A.; Burant, J. C.; Iyengar, S. S.; Tomasi, J.; Cossi, M.; Rega, N.; Millam, J. M.; Klene, M.; Knox, J. E.; Cross, J. B.; Bakken, V.; Adamo, C.; Jaramillo, J.; Gomperts, R.; Stratmann, R. E.; Yazyev, O.; Austin, A. J.; Cammi, R.; Pomelli, C.; Ochterski, J. W.; Martin, R. L.; Morokuma, K.; Zakrzewski, V. G.; Voth, G. A.; Salvador, P.; Dannenberg, J. J.; Dapprich, S.; Daniels, A. D.; Farkas, O.; Foresman, J. B.; Ortiz, J. V.; Cioslowski, J.; Fox, D. J. Gaussian, Inc., Wallingford CT, 2009.
